# Supplementary material for: Evaluation of Efficacy of Radioimmunotherapy with 90Y-Labeled Fully Human Anti-Transferrin Receptor Monoclonal Antibody in Pancreatic Cancer Mouse Models
Source: PubMed Central journal article supplement (PMC4404254; doi:10.1371/journal.pone.0123761), 2015-04-20
Supplement: pone.0123761.s004.pdf [file pone.0123761.s004.pdf]

1 **Supporting information Text S1. Materials and**  
2 **methods for supporting information figures.**

3 **Materials and methods for Figure S2**

4 *In vitro* radiosensitivity assay was conducted as described previously [1]. Briefly, cell  
5 suspension of BxPC-3 and MIAPaCa-2 ( $5 \times 10^4$  cells/mL) was irradiated with 2, 4, 6, and 8  
6 Gy of X-rays, and then BxPC-3 (3,000 cells/well) and MIAPaCa-2 (1,000 cells/well) cells  
7 were seeded in 96-well plates. Four days later, cell proliferation assay was conducted using a  
8 sulforhodamine B-based Toxicology Assay kit (Sigma, St. Louis, MO, USA). The surviving  
9 fraction was calculated as the ratio of absorbance of irradiated cells to that of non-irradiated  
10 cells and analyzed by two-way repeated measures ANOVA.

11 **Materials and methods for Figure S3**

12 Cells were grown on glass coverslips overnight and fixed in cold methanol for 5 min.  
13 Nonspecific binding of antibodies was blocked by applying a Block Ace reagent (Dainippon  
14 Pharmaceutical, Osaka, Japan) with 10% goat serum for 30 min. Cells were incubated with a  
15 primary antibody against SV40 large T antigen as an isotype control overnight at 4°C. A  
16 secondary anti-human antibody conjugated with Cy3 (Jackson Immuno Research  
17 Laboratories, West Grove, PA, USA) was applied for 30 min at room temperature. Nuclei

1 were stained with DAPI in mounting medium (Vector Laboratories, Burlingame, CA, USA).  
2 The images were obtained with an exposure time of 2/3 sec for detecting TfR using a  
3 fluorescence microscope (Olympus, Tokyo, Japan).

4

## 5 **Supporting information Reference S1**

6 1. Sudo H, Tsuji AB, Sugyo A, Ogawa Y, Sagara M, *et al.* (2012) ZDHHC8 knockdown  
7 enhances radiosensitivity and suppresses tumor growth in a mesothelioma mouse  
8 model. *Cancer Sci* 103: 203–209.
